# Supplementary material for: The functional brain favours segregated modular connectivity at old age unless affected by neurodegeneration
Source: PubMed Central journal article supplement (PMC8367990; doi:10.1038/s42003-021-02497-0), 2021-08-16
Supplement: 42003_2021_2497_MOESM3_ESM.pdf [file 42003_2021_2497_MOESM3_ESM.pdf]

## **Description of Additional Supplementary Files**

**File name:** Supplementary Data

**Description:** The supplementary data which contains all source data of graphs and chart in the manuscript.
